# Supplementary material for: Exploring the Diets of Adults with Obesity and Type II Diabetes from Nine Diverse Countries: Dietary Intakes, Patterns, and Quality
Source: MDPI journal article supplement (doi:10.3390/nu12072027), 2020-07-08
Supplement: s1 [file s1]

| <b>Supplemental Table S1. The NDSR Output--Driven Food Groups (n = 14) and their Component Food and Beverage Items (n = 168) Used in Dietary Pattern Analysis <sup>a</sup></b>                                 |                                                                                                                                                                                                                                                    |
|----------------------------------------------------------------------------------------------------------------------------------------------------------------------------------------------------------------|----------------------------------------------------------------------------------------------------------------------------------------------------------------------------------------------------------------------------------------------------|
| <b>Food Group</b>                                                                                                                                                                                              | <b>Food and Beverage Items</b>                                                                                                                                                                                                                     |
| Fruits                                                                                                                                                                                                         | fruits, fruit juice, dried fruits, fried fruits                                                                                                                                                                                                    |
| Vegetables                                                                                                                                                                                                     | green vegetables, yellow vegetables, orange vegetables, tomato, fried vegetables, vegetable juice, pickled vegetables                                                                                                                              |
| Grains, Breads, Starches                                                                                                                                                                                       | whole grains, mixed grains, refined grains, pasta, rice, oatmeal, ready-to-eat cereals, loaf-type breads, rolls, quick breads, corn muffins, tortillas, crackers, snack bars, snack chips, corn, popcorn, potato                                   |
| Red Meats                                                                                                                                                                                                      | beef, veal, lamb, pork, game, cold cuts, sausage, organ meats, eggs                                                                                                                                                                                |
| White Meats and Fish                                                                                                                                                                                           | poultry, fresh fish, smoked fish, fried fish, shellfish                                                                                                                                                                                            |
| Legumes and Plant-Based Proteins                                                                                                                                                                               | legumes, beans, soy products, meat alternatives, egg substitutes                                                                                                                                                                                   |
| Dairy                                                                                                                                                                                                          | milk, ready-to-drink flavored milk, milk beverage powder/dry milk, cheese, yogurt                                                                                                                                                                  |
| Desserts and Sweets                                                                                                                                                                                            | frozen dairy and non-dairy desserts, puddings, cakes, cookies, pies, pastries, doughnuts, cobbles, sugar, syrups, honey, jam, jelly, preserves, sweet sauces, chocolate candy, non-chocolate candy, frosting, glaze, miscellaneous desserts        |
| Fats (Monounsaturated)                                                                                                                                                                                         | avocado, nuts, seeds, nut and seed butters, olive oil                                                                                                                                                                                              |
| Fats (Polyunsaturated and Saturated)                                                                                                                                                                           | margarine, shortening, butter, salad dressings, gravy, sauces, cream                                                                                                                                                                               |
| Water                                                                                                                                                                                                          | tap water, bottled water (plain), plain coffee, plain tea                                                                                                                                                                                          |
| Beverages (Unsweetened and Artificially Sweetened)                                                                                                                                                             | artificially sweetened soft drinks, artificially sweetened fruit drinks, artificially sweetened tea, artificially sweetened coffee, artificially sweetened coffee substitutes, artificially sweetened water, soup broths, non-alcoholic light beer |
| Beverages (Sweetened)                                                                                                                                                                                          | sweetened soft drinks, sweetened fruit drinks, sweetened tea, sweetened coffee, sweetened coffee substitutes, sweetened water, non-alcoholic beer                                                                                                  |
| Alcohol                                                                                                                                                                                                        | Beer, ale, wine, distilled liquor, cordials, liqueurs                                                                                                                                                                                              |
| <sup>a</sup> NDSR Serving Count Totals File: 168 food and beverage items were combined into 14 primary food groups based on ingredients, energy, and macronutrient composition within a standard serving size. |                                                                                                                                                                                                                                                    |

| USA                                                         | Food Group |            |          |           |                      |                            |       |                     |           |               |       |              |            |         |  |
|-------------------------------------------------------------|------------|------------|----------|-----------|----------------------|----------------------------|-------|---------------------|-----------|---------------|-------|--------------|------------|---------|--|
| Food Item                                                   | Fruits     | Vegetables | Starches | Red Meats | White Meats and Fish | Legumes and Plant Proteins | Dairy | Desserts and Sweets | Fats MUFA | Fats PUFA SFA | Water | Bev. Unsweet | Bev. Sweet | Alcohol |  |
| Citrus Juice                                                | 0.32       |            |          |           |                      |                            |       |                     |           |               |       |              |            |         |  |
| Fruit Juice excluding Citrus                                | 0.32       |            |          |           |                      |                            |       |                     |           |               |       |              |            |         |  |
| Citrus Fruit                                                | 0.41       |            |          |           |                      |                            |       |                     |           |               |       |              |            |         |  |
| Fruit excluding Citrus                                      | 0.77       |            |          |           |                      |                            |       |                     |           |               |       |              |            |         |  |
| Dark-Green Vegetables                                       |            | 0.41       |          |           |                      |                            |       |                     |           |               |       |              |            |         |  |
| Deep-Yellow Vegetables                                      |            | 0.39       |          |           |                      |                            |       |                     |           |               |       |              |            |         |  |
| Tomato                                                      |            | 0.38       |          |           |                      | 0.23                       |       |                     |           |               |       |              |            |         |  |
| Other Vegetables                                            |            | 0.77       |          |           |                      |                            |       |                     |           |               |       |              |            |         |  |
| Vegetable Juice                                             |            | 0.17       |          |           |                      |                            |       |                     |           |               |       |              |            |         |  |
| Pickled Foods                                               |            | 0.24       |          |           |                      |                            |       |                     |           |               |       |              |            |         |  |
| Refined Grains                                              |            |            | 0.20     |           |                      | 0.26                       |       |                     | 0.31      |               |       |              |            |         |  |
| Refined Grain Loaf Breads and Rolls                         |            |            | 0.41     |           |                      |                            |       |                     |           |               |       |              |            |         |  |
| Refined Grain Quick Breads, Muffins, Tortillas              |            |            | 0.22     |           |                      |                            |       |                     |           | 0.20          |       |              |            |         |  |
| Pasta                                                       |            |            | 0.27     |           |                      |                            |       |                     |           |               |       |              |            |         |  |
| Beef                                                        |            |            |          | 0.59      |                      |                            |       |                     |           |               |       |              |            |         |  |
| Cold Cuts and Sausage                                       |            |            |          | 0.39      |                      |                            |       |                     |           |               |       |              |            |         |  |
| Lean Cold Cuts and Sausage                                  |            |            |          | 0.30      |                      |                            |       |                     |           |               |       |              |            |         |  |
| Eggs                                                        |            |            |          | 0.39      |                      |                            |       |                     |           | 0.26          |       |              |            |         |  |
| Fresh Pork                                                  |            |            |          |           | 0.22                 |                            |       |                     |           |               |       |              |            |         |  |
| Cured Pork                                                  |            |            |          |           | 0.21                 |                            |       |                     |           |               |       |              |            |         |  |
| Lean Cured Pork                                             |            |            |          |           | 0.21                 |                            |       |                     |           |               |       |              |            |         |  |
| Poultry                                                     |            |            |          |           | 0.28                 |                            |       |                     |           |               |       |              |            |         |  |
| Lean Poultry                                                |            |            |          |           | 0.36                 |                            |       |                     |           |               |       |              |            |         |  |
| Fried Chicken                                               |            |            |          |           | 0.25                 |                            |       |                     |           |               |       |              |            |         |  |
| Lean Fish                                                   |            |            |          |           | 0.30                 |                            |       |                     |           |               |       |              |            |         |  |
| Legumes                                                     |            |            |          |           |                      | 0.91                       |       |                     |           |               |       |              |            |         |  |
| Meat Alternatives                                           |            |            |          |           |                      | 0.40                       |       |                     |           |               |       |              |            |         |  |
| Milk - Reduced Fat                                          |            |            |          |           |                      |                            | 0.40  |                     |           |               |       |              |            |         |  |
| Milk - Low Fat and Fat Free                                 |            |            |          |           |                      |                            | 0.23  |                     |           |               |       |              |            |         |  |
| Cheese - Full Fat                                           |            |            |          | 0.20      |                      |                            | 0.52  |                     |           |               |       |              |            |         |  |
| Cheese - Reduced Fat                                        |            |            |          |           |                      |                            | 0.35  |                     |           |               |       |              |            |         |  |
| Sugar                                                       |            |            |          |           |                      |                            |       | 0.28                |           |               |       |              |            |         |  |
| Sugar Substitute                                            |            |            |          |           |                      |                            |       | 0.64                |           |               |       | 0.22         |            |         |  |
| Chocolate Candy                                             |            |            |          |           |                      |                            |       | 0.20                |           |               |       |              |            |         |  |
| Other Candy                                                 |            |            |          |           |                      |                            |       | 0.20                |           |               |       |              |            |         |  |
| Cakes, Cookies, Pies, Pastries, Danish, Doughnuts, Cobblers |            |            |          |           |                      |                            |       | 0.35                |           | 0.20          |       |              |            |         |  |
| Frozen Dairy Dessert                                        |            |            |          |           |                      |                            |       | 0.27                |           |               |       |              |            |         |  |
| Avocado                                                     |            |            |          |           |                      | 0.20                       |       |                     |           |               |       |              |            |         |  |
| Nuts and Seeds                                              |            |            |          |           |                      |                            |       |                     | 0.50      |               |       |              |            |         |  |
| Nut and Seed Butters                                        |            |            |          |           |                      |                            |       |                     | 0.23      |               |       |              |            |         |  |
| Oil                                                         |            |            |          |           |                      |                            |       | 0.22                | 0.65      |               |       |              |            |         |  |
| Cream - Nondairy                                            |            |            |          |           |                      |                            |       |                     |           |               | 0.22  |              |            |         |  |
| Margarine - Reduced Fat                                     |            |            |          |           |                      |                            |       |                     |           |               | 0.30  |              |            |         |  |
| Shortening                                                  |            |            |          |           | 0.20                 |                            |       |                     |           |               | 0.29  |              |            |         |  |
| Butter - Regular                                            |            |            |          |           |                      |                            |       |                     |           |               | 0.42  |              |            |         |  |
| Salad Dressing - Regular                                    |            | 0.23       |          |           |                      |                            |       |                     |           |               | 0.37  |              |            |         |  |
| Salad Dressing - Reduced Fat                                |            | 0.25       |          |           |                      |                            |       |                     |           |               |       |              |            |         |  |
| Gravy and Sauces - Regular                                  |            |            |          |           |                      |                            |       |                     |           | 0.20          |       |              |            |         |  |
| Gravy and Sauces - Reduced Fat                              |            |            |          | 0.25      |                      |                            |       |                     |           | 0.39          |       |              |            |         |  |
| Soup Broth                                                  |            |            |          |           |                      |                            |       |                     |           |               | 0.20  |              |            |         |  |
| Tea                                                         |            |            |          |           |                      |                            |       |                     |           |               |       | 0.40         |            |         |  |
| Tea - Sweetened                                             |            |            |          |           |                      |                            |       |                     |           |               |       |              | 0.25       |         |  |
| Coffee                                                      |            |            |          |           |                      |                            |       | 0.27                |           |               |       | 0.47         |            |         |  |
| Soft Drinks - Sweetened                                     |            |            |          |           |                      |                            |       |                     |           |               |       |              | 0.76       |         |  |
| Soft Drinks - Artificially Sweetened                        |            |            |          |           |                      |                            |       |                     |           |               |       | 0.53         |            |         |  |
| Fruit Drinks - Sweetened                                    |            |            |          |           |                      |                            |       |                     |           |               |       |              | 0.51       |         |  |
| Fruit Drinks - Artificially Sweetened                       |            |            |          |           |                      |                            |       |                     |           |               |       | 0.23         |            |         |  |
| Beer and Ales                                               |            |            |          |           |                      |                            |       |                     |           |               |       |              |            | 0.56    |  |
| Liquor                                                      |            |            |          |           |                      |                            |       |                     |           |               |       |              |            | 0.47    |  |
| Wine                                                        |            |            |          |           |                      |                            |       |                     |           |               |       |              |            | 0.68    |  |



[illegible]

[illegible]

[illegible]







**Supplemental Figure S1: Results from Spearman Rank-Order Correlation Matrix with  $r \geq 0.20$  Confirming Positive Association Between Individual Food or Beverage Item and Primary Food Group.**
